# Supplementary material
Source: MDPI journal article supplement (https://www.mdpi.com/2227-9717/10/6/1134)
Supplement: s1 [file s1]

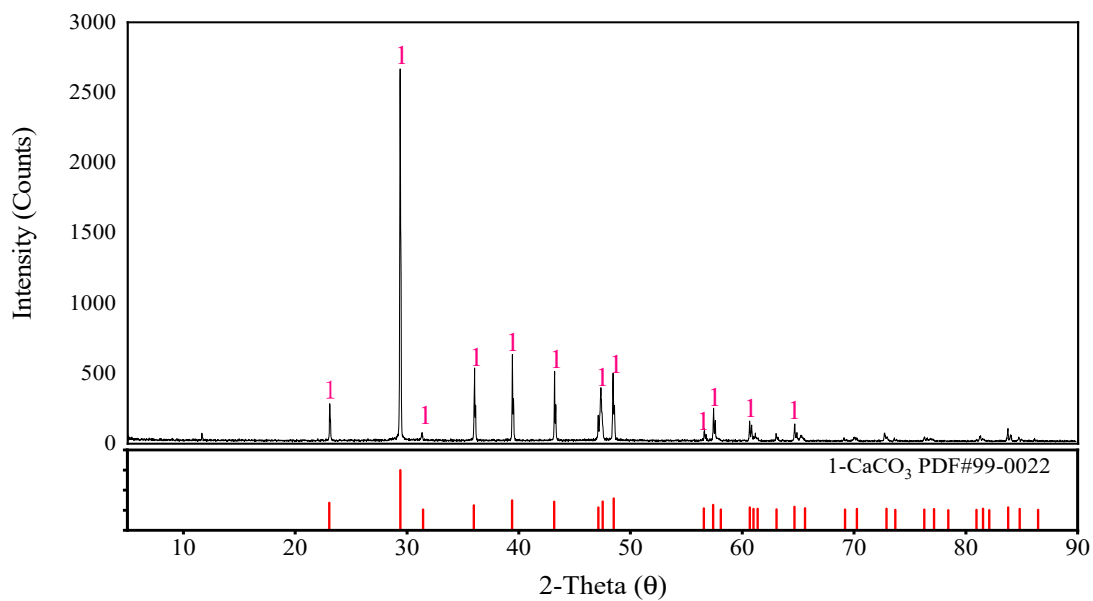

**Figure S1.** X-ray diffraction patterns of the contaminants on the membrane surface.

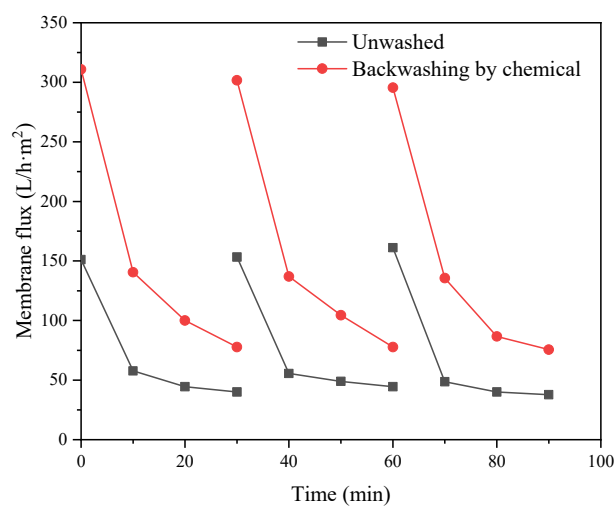

**Figure S2.** UF membrane flux before and after chemical reflux.
